# Supplementary material for: Expression of immunoproteasome genes is regulated by cell-intrinsic and –extrinsic factors in human cancers
Source: PubMed Central journal article supplement (PMC5034284; doi:10.1038/srep34019), 2016-09-23
Supplement: srep34019-s1.pdf [file srep34019-s1.pdf]

# **Expression of immunoproteasome genes is regulated by cell-intrinsic and –extrinsic factors in human cancers**

Alexandre Rouette<sup>1,2,6</sup>, Assya Trofimov<sup>1,2,3,6</sup>, David Haberl<sup>1</sup>, Geneviève Boucher<sup>1</sup>,  
Vincent-Philippe Lavallée<sup>1,2,4,5</sup>, Giovanni D'Angelo<sup>4,5</sup>, Josée Hébert<sup>1,2,4,5</sup>, Guy  
Sauvageau<sup>1,2,4,5</sup>, Sébastien Lemieux<sup>1,3</sup> and Claude Perreault<sup>1,2,4,\*</sup>

<sup>1</sup>Institute for Research in Immunology and Cancer; <sup>2</sup>Department of Medicine and  
<sup>3</sup>Department of Computer Science and Operations Research, Université de Montréal;  
<sup>4</sup>Division of Hematology-Oncology and <sup>5</sup>Quebec Leukemia Cell Bank, Maisonneuve-  
Rosemont Hospital, Montreal, Quebec, Canada;

<sup>6</sup>These authors contributed equally to this work

\*CORRESPONDENCE: Claude Perreault ([claudio.perreault@umontreal.ca](mailto:claudio.perreault@umontreal.ca)), Institute for  
Research in Immunology and Cancer, P.O. Box 6128, Station Centre-Ville, Montreal, QC,  
Canada, H3C 3J7. Phone: 514-343-6126; Fax: 514-343-5839

## **This PDF includes:**

**Supplemental Table S1.** Risk of death associated to expression of proteasome encoding genes.

**Supplemental Table S2.** Functional categories associated to genes specifically correlating with IP in M5 or non-M5 AMLs

**Supplemental Figure S1.** Correlation of CP or IP expression with survival outcome.

**Supplemental Figure S2.** IP expression in human cancer cell lines.

| <b>Breast cancer</b> |                                        |                 |
|----------------------|----------------------------------------|-----------------|
| Gene Name            | Hazard Ratio [95% Confidence Interval] | <i>p</i> -value |
| <i>PSMB5</i>         | 0.56 [0.15 – 2.12]                     | 0.393           |
| <i>PSMB6</i>         | 0.47 [0.11 – 2.06]                     | 0.316           |
| <i>PSMB7</i>         | 1.49 [0.29 – 7.65]                     | 0.634           |
| <i>PSMB8</i>         | 0.34 [0.18 – 0.63]                     | 0.001           |
| <i>PSMB9</i>         | 0.60 [0.34 – 1.04]                     | 0.067           |
| <i>PSMB10</i>        | 0.31 [0.14 – 0.66]                     | 0.003           |
| <b>AML</b>           |                                        |                 |
| Gene Name            | Hazard Ratio [95% Confidence Interval] | <i>p</i> -value |
| <i>PSMB5</i>         | 2.95 [0.82 – 10.7]                     | 0.099           |
| <i>PSMB6</i>         | 2.82 [0.66 – 12.1]                     | 0.162           |
| <i>PSMB7</i>         | 2.14 [0.19 – 24.4]                     | 0.541           |
| <i>PSMB8</i>         | 6.30 [1.56 – 25.6]                     | 0.001           |
| <i>PSMB9</i>         | 2.25 [0.88 – 5.73]                     | 0.088           |
| <i>PSMB10</i>        | 2.85 [0.91 – 8.93]                     | 0.072           |

**Supplementary Table S1. Risk of death associated to expression of proteasome encoding genes.** Cox proportional hazards models were used to estimate hazard ratios, 95% confidence intervals and *p*-values associated with expression of proteasome-encoding genes as linear covariates.

| Functional Category             | M5<br><i>PSMB8</i> | M5<br><i>PSMB9</i> | M5<br><i>PSMB10</i> | non-M5<br><i>PSMB8</i> | non-M5<br><i>PSMB9</i> | non-M5<br><i>PSMB10</i> |
|---------------------------------|--------------------|--------------------|---------------------|------------------------|------------------------|-------------------------|
| Apoptotic process               | 3.3                | 1.5                | 0.0                 | 3.0                    | 2.1                    | 0.0                     |
| Cell cycle                      | 11.5               | 9.1                | 0.0                 | 5.1                    | 5.2                    | 7.0                     |
| Death                           | 1.6                | 1.5                | 0.0                 | 0.0                    | 0.0                    | 0.0                     |
| DNA damage response             | 16.4               | 0.0                | 0.0                 | 0.0                    | 4.2                    | 1.8                     |
| Immune process                  | 6.6                | 10.6               | 0.0                 | 74.8                   | 59.4                   | 26.3                    |
| Macromolecule catabolism        | 19.7               | 0.0                | 0.0                 | 13.1                   | 5.2                    | 15.8                    |
| Membrane invagination           | 11.5               | 0.0                | 2.8                 | 0.0                    | 0.0                    | 0.0                     |
| Mitochondria                    | 23.0               | 0.0                | 0.0                 | 0.0                    | 0.0                    | 3.5                     |
| Multi-organism process          | 1.6                | 1.5                | 0.0                 | 1.0                    | 1.0                    | 5.3                     |
| Viral process                   | 4.9                | 1.5                | 0.0                 | 0.0                    | 0.0                    | 0.0                     |
| Metabolism and gene expression  | 0.0                | 56.1               | 75.0                | 1.0                    | 11.5                   | 28.1                    |
| Stress response                 | 0.0                | 18.2               | 0.0                 | 0.0                    | 1.0                    | 3.5                     |
| Cell signaling                  | 0.0                | 0.0                | 22.2                | 2.0                    | 6.3                    | 3.5                     |
| Extracellular transport         | 0.0                | 0.0                | 0.0                 | 0.0                    | 4.2                    | 0.0                     |
| Cellular component organisation | 0.0                | 0.0                | 0.0                 | 0.0                    | 0.0                    | 5.3                     |

**Supplementary Table S2. Functional categories associated to genes specifically correlating with IP in M5 or non-M5 AMLs.** Enriched gene-ontology terms for genes specifically correlated to IP genes in M5 and non-M5 AMLs were assigned to functional categories using Revigo (see Figure 6 and Methods). Each functional category is depicted as a percentage of total categories for its column and plotted in Figure 6.

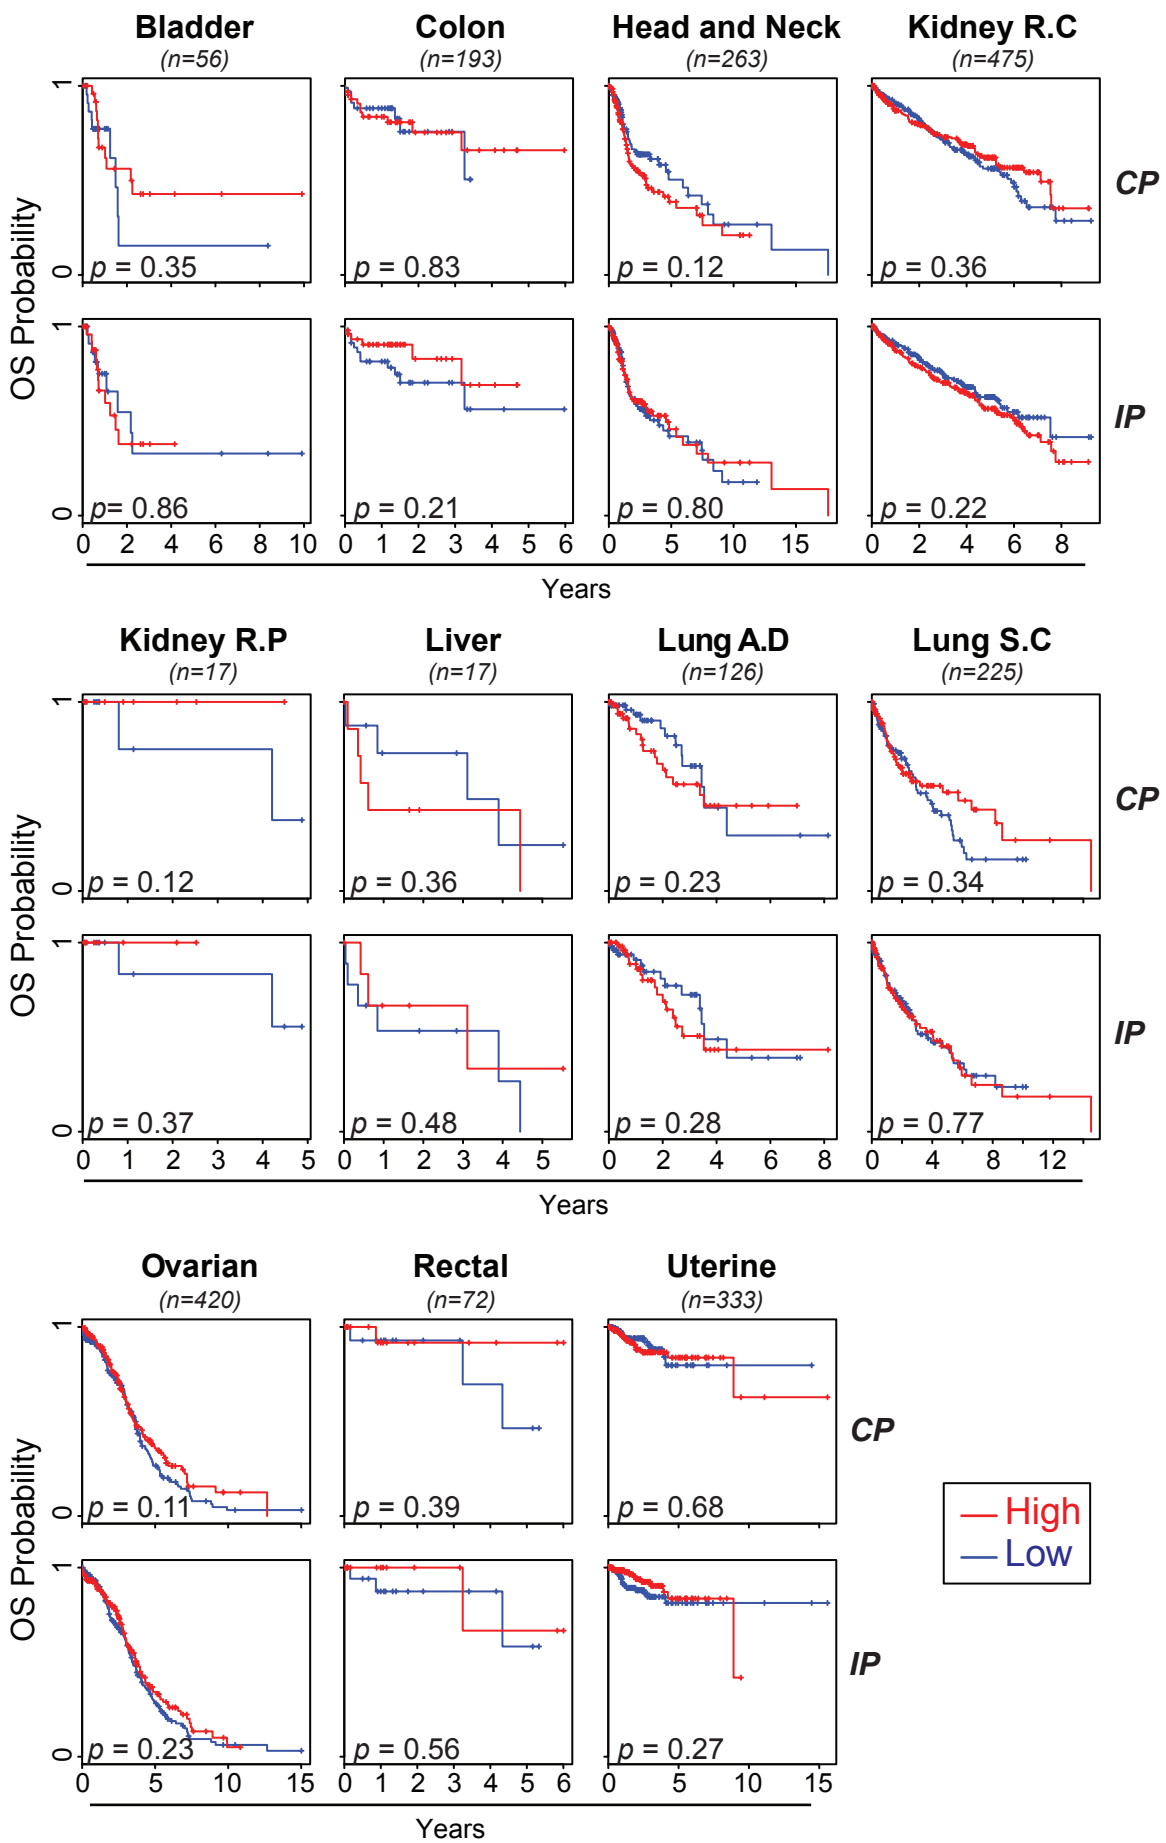

**Supplementary Figure S1. Correlation of CP or IP expression with survival outcome.** Patients were divided in two equal groups based on CP or IP z-score. Kaplan-Meier plots of overall survival (OS) for CP<sup>high</sup>/CP<sup>low</sup> patients, or IP<sup>high</sup>/IP<sup>low</sup> patients are shown for the indicated cancer type. *p*-values were calculated using the log-rank test. R.C: Renal Cell; R.P: Renal Papillary; A.D: Adenocarcinoma; S.C: Squamous Cell.

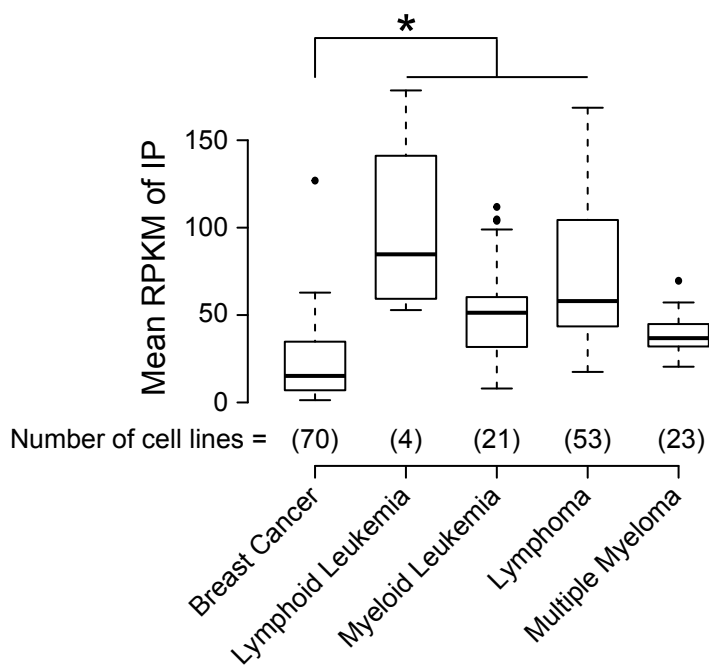

**Supplementary Figure S2. IP expression in human cancer cell lines.**

Boxplots of the mean RPKM of *PSMB8*, *PSMB9* and *PSMB10*. Numbers in parenthesis indicate the number of cell lines per disease type. Differences between means were determined by one-way analysis of variance (ANOVA) followed by Tukey's post-hoc test. \* indicates  $p < 0.01$ .
